# Supplementary material
Source: PubMed Central journal article supplement (PMC11029495)
Supplement: 262_2015_1657_MOESM1_ESM.pdf [file 262_2015_1657_MOESM1_ESM.pdf]

Supplemental Table 1

| Receptor | Resting NK | IL-15 activated NK | Fold increase |
|----------|------------|--------------------|---------------|
| DNAM-1   | 24.9       | 37.6               | 1.5           |
| NKG2D    | 30.3       | 157.4              | 5.2           |
| NKp30    | 6.8        | 19.9               | 2.9           |
| NKp44    | 13.1       | 93.3               | 7.1           |
| NKp46    | 5.0        | 13.1               | 2.6           |

Supplemental Table 1: Up regulation of activating NK cell receptors after stimulation of NK cells with IL-15.

Expression of the activating cell NK receptors (NKG2D, DNAM-1 and NCRs) was determined on freshly isolated NK cells (resting NK) and on these NK cells after activation with IL-15 (10 ng/mL) by flow cytometry (n=3).

Mean fluorescence intensity (MFI) ratio of specific staining versus isotype control is shown.

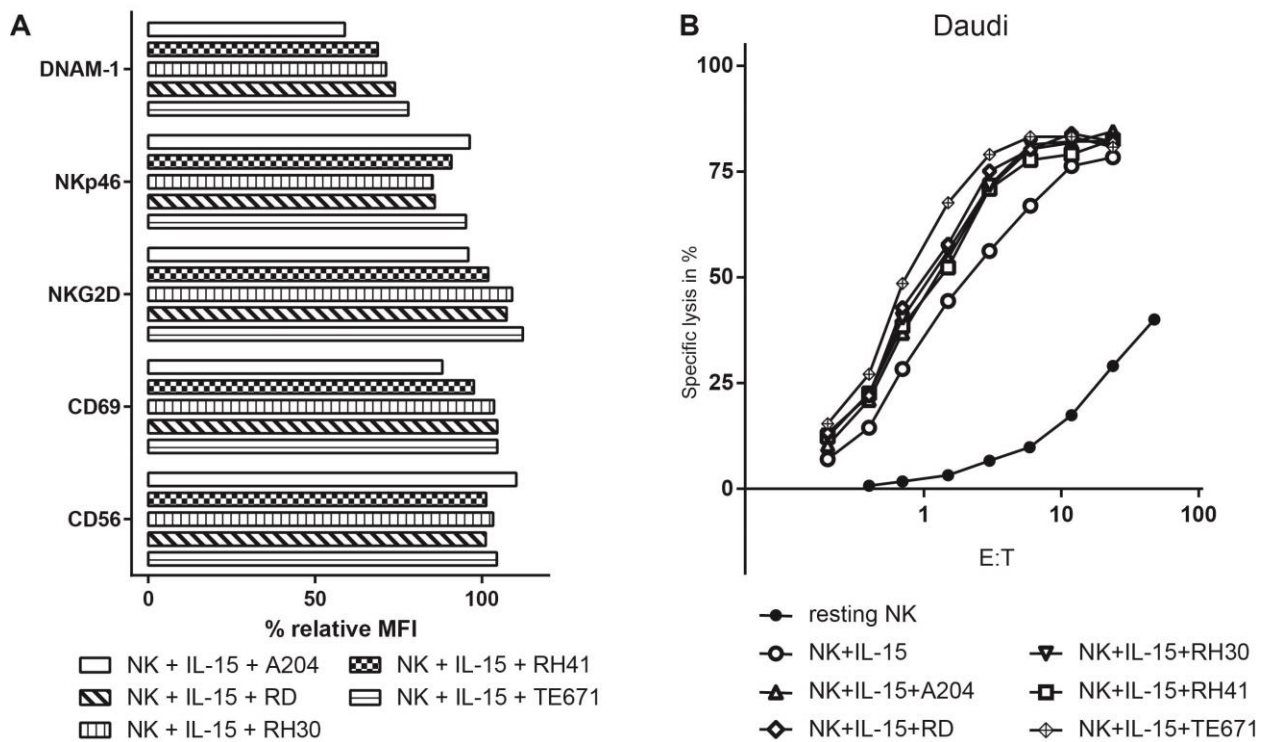

Supplemental Figure 1 Effect of co-cultivation of IL-15 activated NK cells with RMS cells on NK cell receptor expression and cytotoxicity.

Purified NK cells were co-cultivated for 40 hours with RMS cells in the presence of IL-15. After culture the NK cells were harvested and NK cell receptor expression (**A**) and specific lysis of Daudi cells (**B**) was measured.

(**A**) Data are depicted as percentage of the mean fluorescence intensity obtained for the control (NK cells cultured only presence of IL-15).

(**B**) Specific lysis was measured at various effector : target (E:T) ratios. Controls consisted of NK cells cultured alone in the absence (closed circles) or presence of IL-15 (open circles).
